# Supplementary material for: Asymmetric apical domain states of mitochondrial Hsp60 coordinate substrate engagement and chaperonin assembly
Source: PubMed Central journal article supplement (PMC11638070; doi:10.1038/s41594-024-01352-0), 2024-07-01

# Source Data for Extended Data Fig. 1f | Uncropped gel.

1  $\mu\text{M}$   
5  $\mu\text{M}$   
(shown in figure)  
10  $\mu\text{M}$

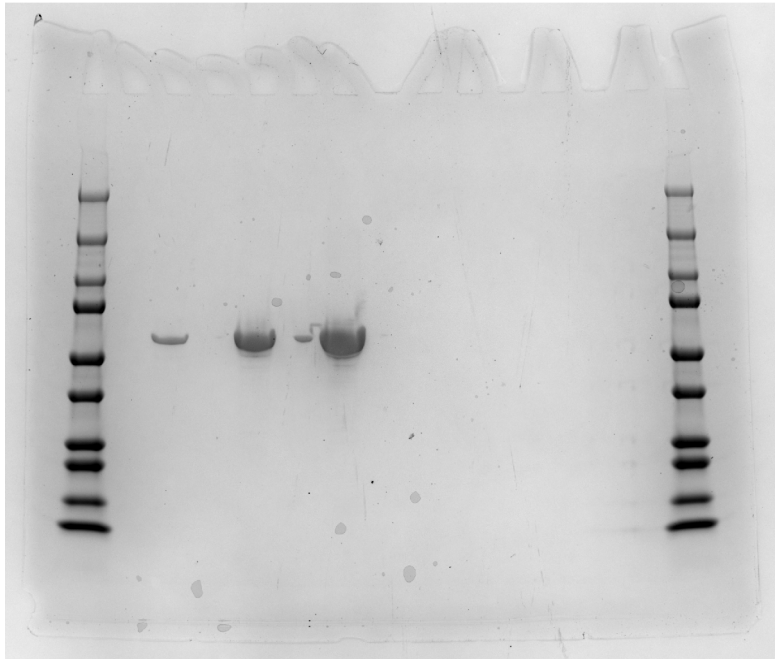

Supplement: 41594_2024_1352_MOESM8_ESM.pdf [file 41594_2024_1352_MOESM8_ESM.pdf]
